# Supplementary material
Source: Springer Nature journal article supplement (https://www.springermedizin.de/resource/supplementary/13002_2010_260_MOESM3_ESM.pdf/9627488)

Threat factors

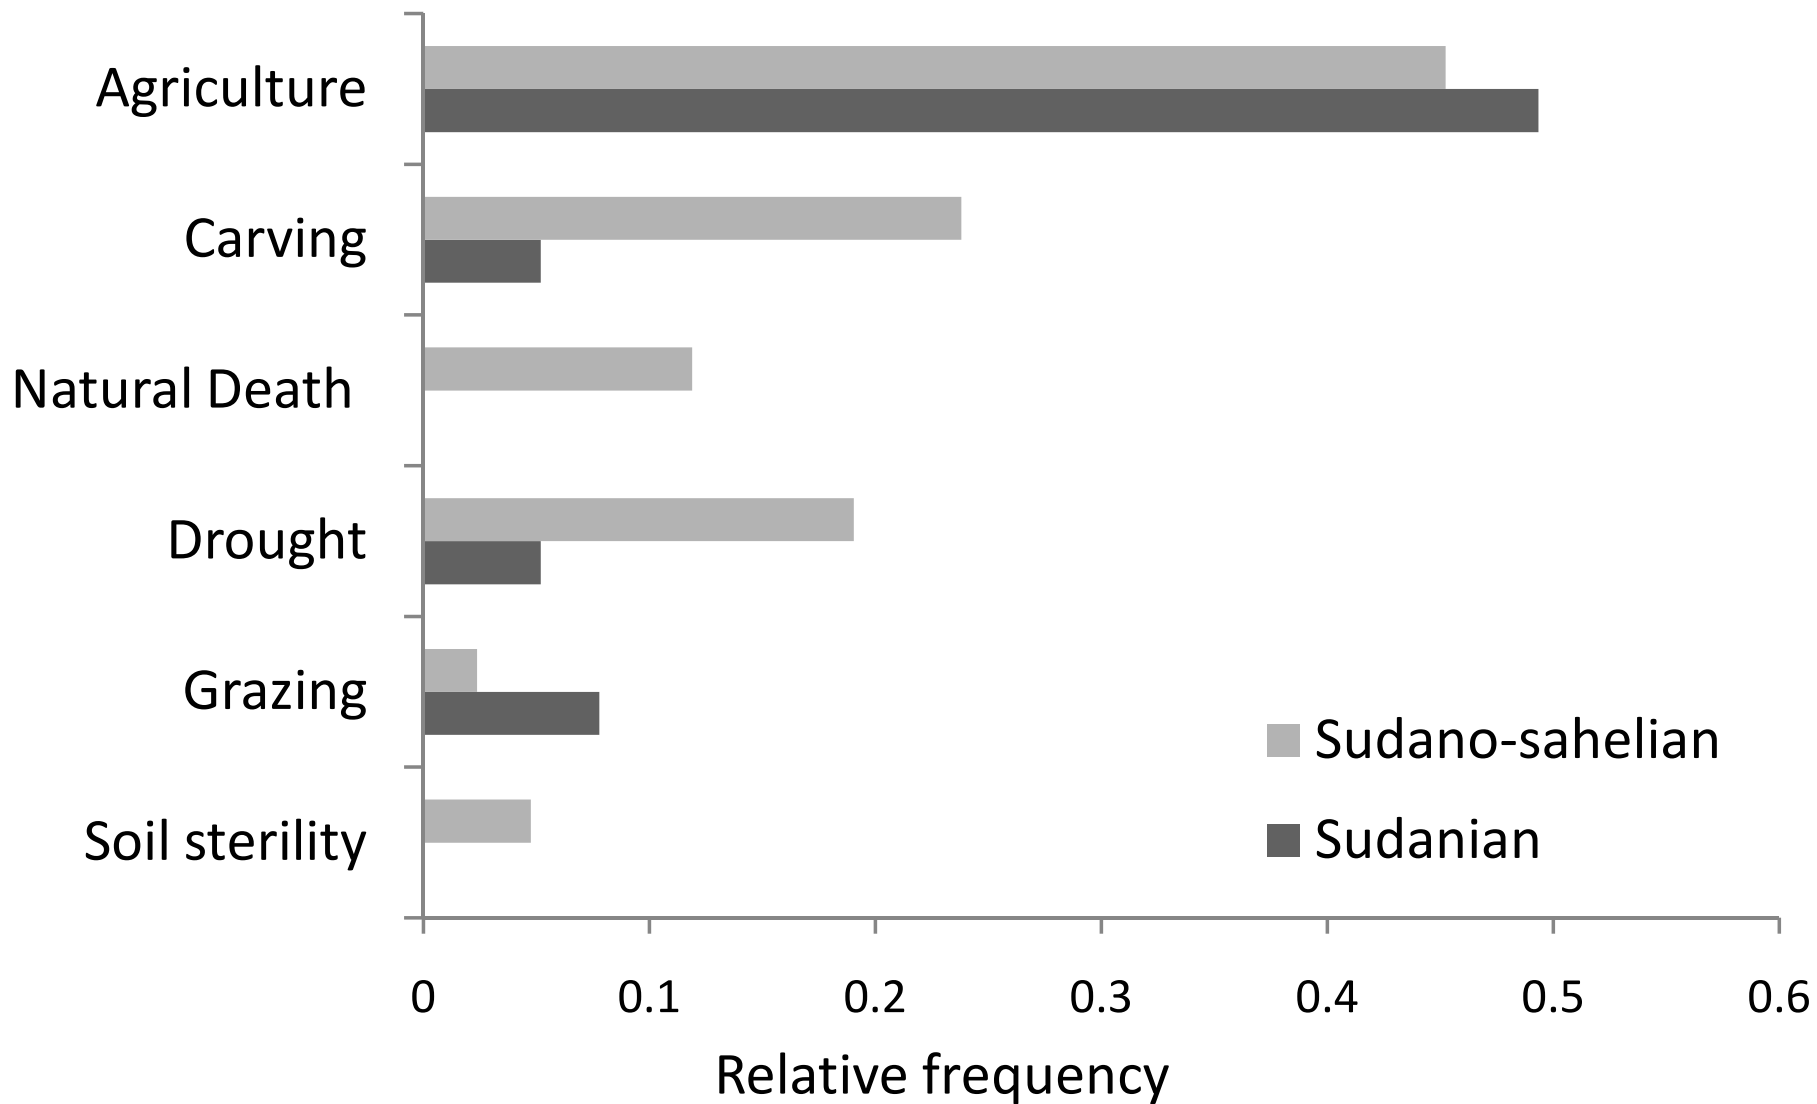

Supplement: MOESM3 [file 9627488]
